# Supplementary material
Source: MDPI journal article supplement (https://www.mdpi.com/2073-4441/14/18/2925)
Supplement: s1 [file s1]

Archive with 3 entries (3 files):
- Supplemental Figure S1-2.pdf
- Supplemental tables_9_16_22.xlsx
- Supplementary Document S1.pdf
