# Supplementary material
Source: MDPI journal article supplement (https://www.mdpi.com/2073-4441/14/18/2925)
Supplement: s1 [file s1]

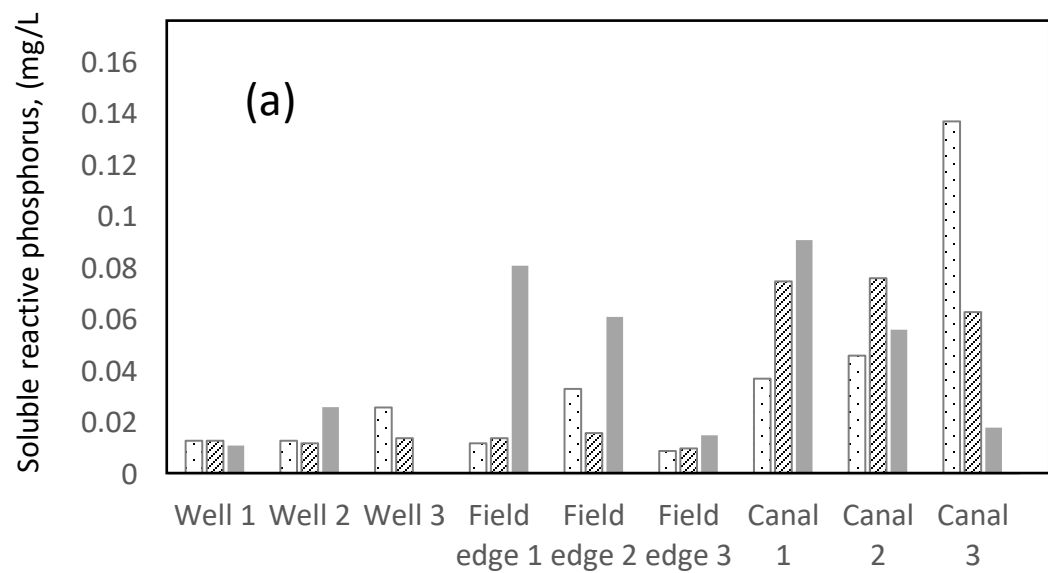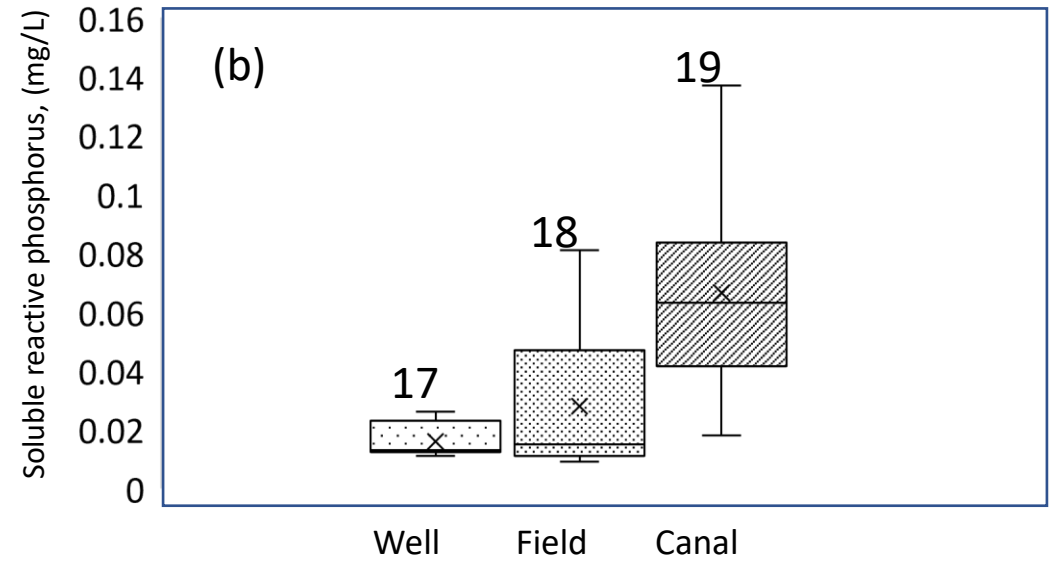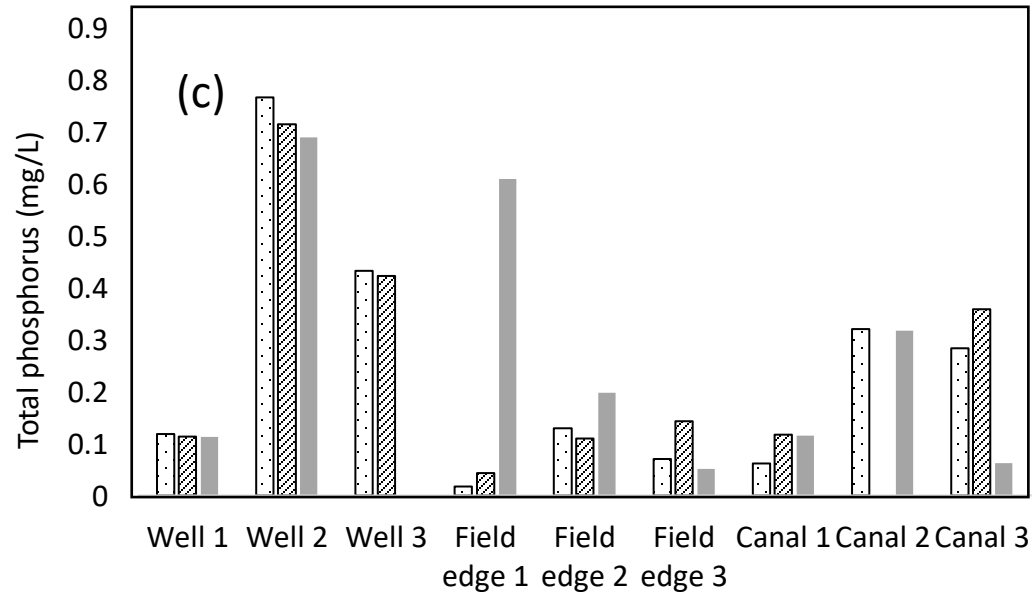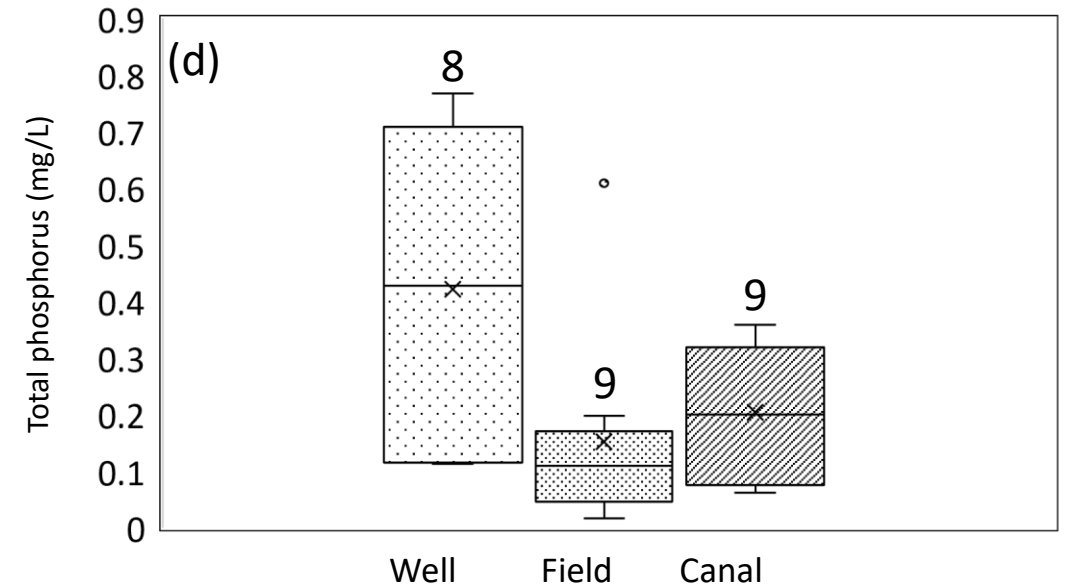

Figure S1. Soluble reactive phosphorus (SRP) concentrations measured in well, field, and canal samples collected on three occasions in the 2015 irrigation season (a); SRP concentrations for each group of wells, field drains, and receiving canals sampled on three occasions in 2015 (b); total phosphorus (TP) concentrations measured in well, field, and canal samples collected on three occasions in the 2015 irrigation season (c); and TP concentrations measured for each group of wells, fields, and canals sampled in 2015 (d).

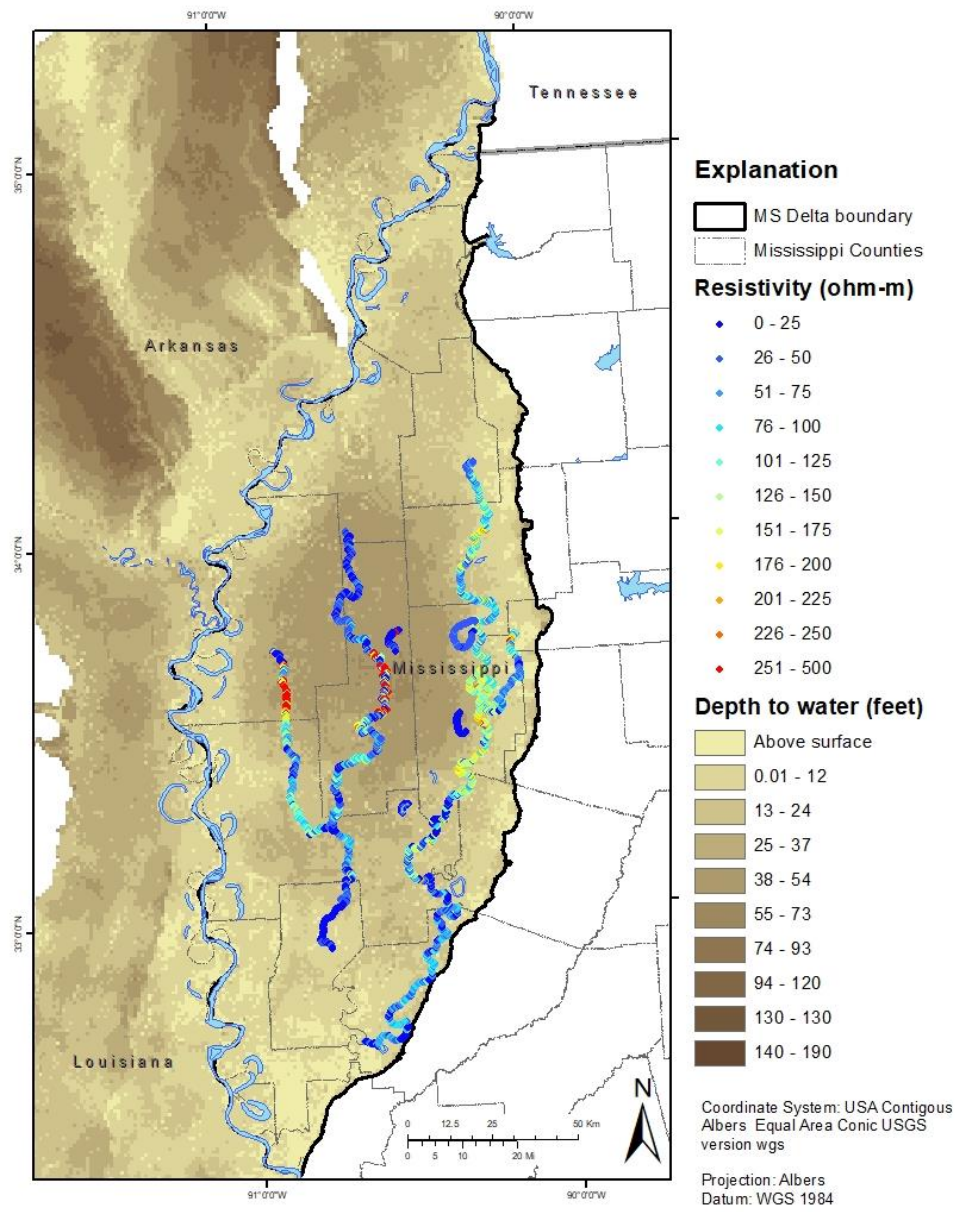

Figure S2. Streambed hydraulic resistivity measurements in the Mississippi Delta (modified from [79] in press)
