# Supplementary material
Source: MDPI journal article supplement (https://www.mdpi.com/2073-4441/14/18/2925)
Supplement: s1 [file s1 › Supplemental tables_9_16_22.xlsx]

## Sheet: SupTable S1
Table S1. Constitutuents analyzed in groundwater and
surface water samples evaluated from the Mississippi Delta.
Temperature	Noncarbonate hardness
Specific conductance	Calcium
Hydrogen ion	Magnesium
Dissolved oxygen	Sodium
pH	Potassium
Carbon dioxide	Chloride
Bicarbonate	Sulfate
Total nitrogen	Fluoride
Organic nitrogen	Silica
Ammonia	Iron
Nitrite	Manganese
Nitrate	Alkalinity
Ammonia plus organic nitrogen	Turbidity
Nitrate plus nitrite	Dissolved solids
Total phosphorus	Nitrate
Total dissolved phosphorus	Nitrite
Soluble reactive phosphorus	Bromide
Organic carbon	Methane
Hardness

## Sheet: Table S2 Supp 2 GW sites
Table S2. Station identifiers and number of soluble reactive and total dissolved phosphorus samples
collected for 108 wells sampled in the Mississippi Delta from 1998 to 2017 and analyzed for this study.
[No., number]
USGS Station number	No. of samples		USGS Station number	No. of samples		USGS Station number	No. of samples
323047090484401	14		332440090502201	5		334923090332001	1
324355090391801	2		332443090502301	5		334955090402202	4
324358090335201	1		332443090502302	15		334956090402201	2
324956090412201	1		332443090502501	7		335025090440801	1
325516090570701	9		332443090502502	14		335105090193101	1
325723091001901	1		332443090502701	3		335207090165501	2
325728091002701	7		332443090502702	14		335226091004201	2
325816090464202	5		332445090501601	15		335308090362102	3
325816090464203	1		332445090501602	1		335318090303001	2
325816090464204	1		332524090081701	1		335421090092801	1
325817090464201	5		332530090211201	1		335442091163901	1
325817090464204	4		332541090503301	2		335754090541101	15
325817090464210	2		332606090563001	1		335910090532901	14
325917090230601	1		332613091255101	3		340002090424501	1
330142091000801	2		332613091255102	2		340021091320101	1
330152090595601	2		332638090421801	1		340029090342601	1
330152090595602	1		332730090280501	2		340135090102201	1
330152090595603	3		333145090261901	5		340413090340301	2
330152090595604	1		333229090050401	1		341020090314701	1
330152090595605	1		333230090270901	1		341149090231801	1
330159091061301	1		333246090041201	1		341210090343701	6
330330090572601	1		333250090323803	1		341210090343701	5
330413090192501	1		333250090323804	1		341210090343703	4
331037090404501	1		333250090323805	1		341233090393601	2
331224090461201	1		333251090323801	6		341827090080501	3
331255090570701	1		333251090323803	1		342304091500001	1
331328090433901	1		333251090323804	4		342457090195001	1
331601090562801	4		333251090323805	1		342522090295101	1
332233090562301	1		333729090570301	7		342645090101901	1
332242091030401	1		333804090540901	1		343322090292101	2
332304090201001	2		333900090123703	1		343551090230201	1
332340090320001	1		333904090123701	1		343710090174501	2
332348090505301	7		333904090123702	1		344242091103001	1
332440090502001	13		333904090123703	1		344727090232901	1
332440090502195	9		333904090123801	6		345628090295701	1
332440090502196	6		333950090430601	1
332440090502197	12		334804090500801	1

## Sheet: Sup Table S3_SW site
Table S3. Information for surface water quality sites where sampling occurred and with historic data evaluated in this study.
[SRP; soluble reactive phosphorus; total dissolved phosphorus; TP, total phosphorus; GW, groundwater; SW, surface water
					Number and location of samples
USGS Station Identifier	Station name	USGS Station Identifier	Latitude	Longitude	SRP	TDP	TP	2014-15 Irrigation path	2017 GW/ SW compar-ison	Historic sites
07288636	Tommie Bayou at Pace, MS (Canal 1 )	7/8/15 - 8/11/15	33.7919	90.8525	3		3	X
0728886910	Steele Bayou near Grace, MS	5/28/2014 - 8/25/2014	32.915	90.9528	14		14	X
325458090571201	Agricultural field drain near Rolling Fork, MS	7/3/2014 - 8/25/2014	32.9162	90.9533	9		9	X
331628090544700	Agricultural field drain 1 near Arcola, MS	7/8/2015 - 8/05/2015	33.2747	90.9132	3		3	X
331629090544700	Ditch to Black Bayou near Arcola, MS	7/8/2015 - 8/04/2015	33.2748	90.9132	3		3	X
333701090571100	Ditch to Clear Creek near Benoit, MS	7/7/2015 - 8/24/2015	33.617	90.9531	3		3	X
334806090502800	Agricultural Field Drainage No.1 near Pace, MS	7/8/2015 - 8/11/2015	33.8017	90.8412	3		3	X
333702090571100	Agricultural Field Drainage No.1 near Benoit, MS	7/7/2015 - 8/24/2015	33.6172	90.9531	3		3	X
07288700	Big Sunflower River nr Anguilla, MS	3/30/2017 - 9/26/2017	32.9717	90.7778	4		4		X
07288000	Big Sunflower River at Clarksdale, MS	3/28/2017 - 8/2/2017	33.1972	90.575	3		3		X
07288860	Steele Bayou at Hopedale, MS	4/19/2017 - 9/26/2017	32.9581	91.0075	4		4		X
07281600	Tallahatchie River at Money, MS	3/28/2017 - 9/28/2017	33.6514	90.2111	4		4		X
323045090484300	Big Sunflower Diversion Canal nr Redwood, MS	4/19/2017 - 9/20/2017	32.5125	90.8119	4		4		X
07288500	Big Sunflower River at Sunflower, MS	5/8/97 - 7/27/17	33.5472	90.8325	11	3	35		X	X
07288280	Big Sunflower nr Merigold, MS	2/14/2002 - 9/28/17	33.8325	90.67	9		14		X	X
07288650	Bogue Phalia nr Leland, MS	2/16/1996 - 7/21/2020	33.3967	90.8478	379	271	409		X	X
07288068	Harris Bayou at Palmer Rd East of Alligator, MS	10/29/2009 - 12/10/19	34.0748	90.6249	0		274			X
07288521	Porter Bayou at Stephensville, MS	11/17/2009 - 12/10/19	33.5483	90.6724	0		473			X
07288580	Quiver River nr Sunflower, MS	4/17/2012 - 9/28/17	33.5294	90.4386	4		34		X	X
07288048	Richies Bayou at Sherard, MS	8/8/2012 - 12/10/19	34.2092	90.7002	0		245			X
07288847	Steele Bayou nr Glen Allan, MS	3/7/90 - 9/26/17	33.0314	90.9981	113	12	125		X	X

## Sheet: Sup Table S4ab
Table S4. Soluble reactive phosphorus (SRP) and total phosphorus (TP) concentrations (in milligrams per liter) for samples
collected from four irrigation clusters, each containing an irrigation well, associated field drain, and receiving canal site in 2014 (a) and 2015 (b).
[NA, not sampled or analyzed; <, laboratory reporting limit]
USGS Station Identifier	General site name	Cluster number	Sample date	Sample type	SRP (mg/L)	Median SRP (mg/L)	TP (mg/L)	Median TP (mg/L)
a.
325516090570701	Irrigation well (Issaquena County, MS)	1	2014-05-23	Well	0.011		NA
325516090570701	Irrigation well (Issaquena County, MS)	1	2014-07-03	Well	0.01		NA
325516090570701	Irrigation well (Issaquena County, MS)	1	2014-07-09	Well	0.012		NA
325516090570701	Irrigation well (Issaquena County, MS)	1	2014-07-14	Well	0.007		NA
325516090570701	Irrigation well (Issaquena County, MS)	1	2014-07-23	Well	0.015		NA
325516090570701	Irrigation well (Issaquena County, MS)	1	2014-07-29	Well	0.009		NA
325516090570701	Irrigation well (Issaquena County, MS)	1	2014-08-05	Well	0.009		NA
325516090570701	Irrigation well (Issaquena County, MS)	1	2014-08-14	Well	0.006		NA
325516090570701	Irrigation well (Issaquena County, MS)	1	2014-08-19	Well	0.009	0.009	NA	NA
325458090571201	Agricultural field drain near Rolling Fork, MS	1	2014-07-03	Field drain	0.032		NA
325458090571201	Agricultural field drain near Rolling Fork, MS	1	2014-07-09	Field drain	0.058		NA
325458090571201	Agricultural field drain near Rolling Fork, MS	1	2014-07-14	Field drain	0.031		NA
325458090571201	Agricultural field drain near Rolling Fork, MS	1	2014-07-23	Field drain	0.024		NA
325458090571201	Agricultural field drain near Rolling Fork, MS	1	2014-07-29	Field drain	0.022		NA
325458090571201	Agricultural field drain near Rolling Fork, MS	1	2014-08-05	Field drain	0.021		NA
325458090571201	Agricultural field drain near Rolling Fork, MS	1	2014-08-14	Field drain	0.058		NA
325458090571201	Agricultural field drain near Rolling Fork, MS	1	2014-08-19	Field drain	0.037		NA
325458090571201	Agricultural field drain near Rolling Fork, MS	1	2014-08-25	Field drain	0.046	0.032	NA	NA
0728886910	Steele Bayou near Grace, MS	1	2014-05-28	Canal	0.083		NA
0728886910	Steele Bayou near Grace, MS	1	2014-05-28	Canal	0.055		NA
0728886910	Steele Bayou near Grace, MS	1	2014-05-28	Canal	0.041		NA
0728886910	Steele Bayou near Grace, MS	1	2014-05-28	Canal	0.031		NA
0728886910	Steele Bayou near Grace, MS	1	2014-07-03	Canal	0.034		NA
0728886910	Steele Bayou near Grace, MS	1	2014-07-09	Canal	0.147		NA
0728886910	Steele Bayou near Grace, MS	1	2014-07-14	Canal	0.069		NA
0728886910	Steele Bayou near Grace, MS	1	2014-07-17	Canal	0.018		NA
0728886910	Steele Bayou near Grace, MS	1	2014-07-23	Canal	0.056		NA
0728886910	Steele Bayou near Grace, MS	1	2014-07-29	Canal	0.067		NA
0728886910	Steele Bayou near Grace, MS	1	2014-08-05	Canal	0.071		NA
0728886910	Steele Bayou near Grace, MS	1	2014-08-14	Canal	0.081		NA
0728886910	Steele Bayou near Grace, MS	1	2014-08-19	Canal	0.106		NA
0728886910	Steele Bayou near Grace, MS	1	2014-08-25	Canal	0.063	0.065	NA	NA
b.
334803090501801	G0279 BOLIVAR (Irrigation well 1)	2	2015-07-08	Well	0.013		0.118
334803090501801	G0279 BOLIVAR (Irrigation well 1)	2	2015-07-28	Well	0.013		0.114
334803090501801	G0279 BOLIVAR (Irrigation well 1)	2	2015-08-11	Well	0.011	0.013	0.113	0.114
334806090502800	Agricultural Field Drainage No.1 near Pace, MS	2	2015-07-08	Field drain	0.012		0.017
334806090502800	Agricultural Field Drainage No.1 near Pace, MS	2	2015-07-28	Field drain	0.014		0.043
334806090502800	Agricultural Field Drainage No.1 near Pace, MS	2	2015-08-11	Field drain	0.081	0.014	0.609	0.043
07288636	Tommie Bayou at Pace, MS	2	2015-07-08	Canal	0.037		0.062
07288636	Tommie Bayou at Pace, MS	2	2015-07-28	Canal	0.075		0.117
07288636	Tommie Bayou at Pace, MS	2	2015-08-11	Canal	0.091	0.075	0.115	0.115
333729090570301	O0169 BOLIVAR (Irrigation well 2)	3	2015-07-07	Well	0.013		0.767
333729090570301	O0169 BOLIVAR (Irrigation well 2)	3	2015-07-28	Well	0.012		0.715
333729090570301	O0169 BOLIVAR (Irrigation well 2)	3	2015-08-24	Well	0.026	0.013	0.69	0.715
333702090571100	Agricultural Field Drainage No.1 near Benoit, MS	3	2015-07-07	Field drain	0.033		0.13
333702090571100	Agricultural Field Drainage No.1 near Benoit, MS	3	2015-07-28	Field drain	0.016		0.11
333702090571100	Agricultural Field Drainage No.1 near Benoit, MS	3	2015-08-24	Field drain	0.061	0.033	0.198	0.13
333701090571100	Ditch to Clear Creek near Benoit, MS	3	2015-07-07	Canal	0.046		0.32
333701090571100	Ditch to Clear Creek near Benoit, MS	3	2015-07-28	Canal	0.076		3.66
333701090571100	Ditch to Clear Creek near Benoit, MS	3	2015-08-24	Canal	0.056	0.056	0.318	0.32
331601090562801	L0153 WASHINGTON (Irrigation well 3)	4	2015-07-08	Well	0.026		0.433
331601090562801	L0153 WASHINGTON (Irrigation well 3)	4	2015-07-29	Well	0.014	0.02	0.423	0.428
331601090562801	L0153 WASHINGTON (Irrigation well 3)	4	2015-08-05	Well	NS	NS	NS	NS
331628090544700	Agricultural field drain 1 (near Arcola, MS)	4	2015-07-08	Field drain	0.009		0.07
331628090544700	Agricultural field drain 1 (near Arcola, MS)	4	2015-07-29	Field drain	0.01		0.143
331628090544700	Agricultural field drain 1 (near Arcola, MS)	4	2015-08-05	Field drain	0.015	0.01	0.051	0.07
331629090544700	Ditch to Black Bayou near Arcola, MS	4	2015-07-08	Canal	0.137		0.284
331629090544700	Ditch to Black Bayou near Arcola, MS	4	2015-07-29	Canal	0.063		0.359
331629090544700	Ditch to Black Bayou near Arcola, MS	4	2015-08-04	Canal	0.018	0.063	0.063	0.284
